# Supplementary material for: Bacterial Community Is Affected by Locations and Time Rather Than Potato Varieties but Streptomyces spp. Are Related to Potato Varieties
Source: MDPI journal article supplement (doi:10.3390/d13120659), 2021-12-11
Supplement: s1 [file s1]

## Supplementary figures and tables

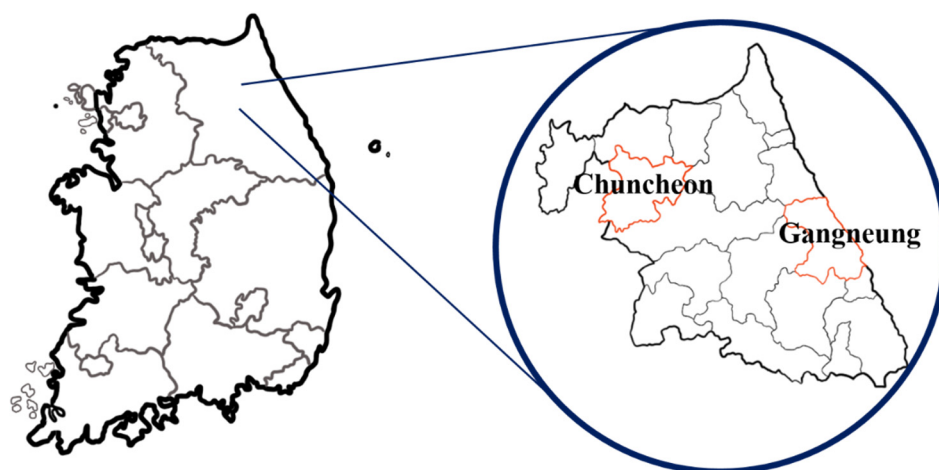

| Experiment Information |                                                                                           |              |               |
|------------------------|-------------------------------------------------------------------------------------------|--------------|---------------|
| Province               | Location                                                                                  | Latitude     | Longitude     |
| Gangneung              | Gangneung Potato Research Center<br>(Experimental field facility)                         | 37°48'47.2"N | 128°49'58.1"E |
| Chuncheon              | Gangwon-do Agricultural Research and Extension Services<br>(Chuncheon experimental field) | 37°57'05.5"N | 127°46'29.5"E |

**Figure S1.** Details of soil sampling sites and its exact GPS (Global Positioning System) locations.

**Table S1.** Average environmental conditions for a week to each locations (Gangneung and Chuncheon) during pre and post harvesting of potato.

| Gangneung Location                |                   |                 |
|-----------------------------------|-------------------|-----------------|
| Parameters                        | April 27 to May 3 | July 20–26      |
| One week mean temperature (°C)    | 19.3              | 22.1            |
| One week maximum temperature (°C) | 24.4              | 24.6            |
| One week minimum temperature (°C) | 12.9              | 19.7            |
| One week mean precipitation (mm)  | 0.36              | 28.13           |
| Chuncheon Location                |                   |                 |
|                                   | May 4–10          | August 10 to 16 |
| One week mean temperature (°C)    | 18.0              | 26.8            |
| One week maximum temperature (°C) | 23.8              | 29.6            |
| One week minimum temperature (°C) | 12.5              | 24.3            |
| One week mean precipitation (mm)  | 6.04              | 15.39           |

*Note:* April 27 to May 3 -> environmental parameters before planting of potato in Gangneung field location.

July 20 – 26 - environmental parameters after harvesting of potato in Gangneung field location.

May 4 -10 -> environmental parameters before planting of potato in Chuncheon field location.

August 10 to 16 -> environmental parameters after harvesting of potato in Chuncheon.

field location.

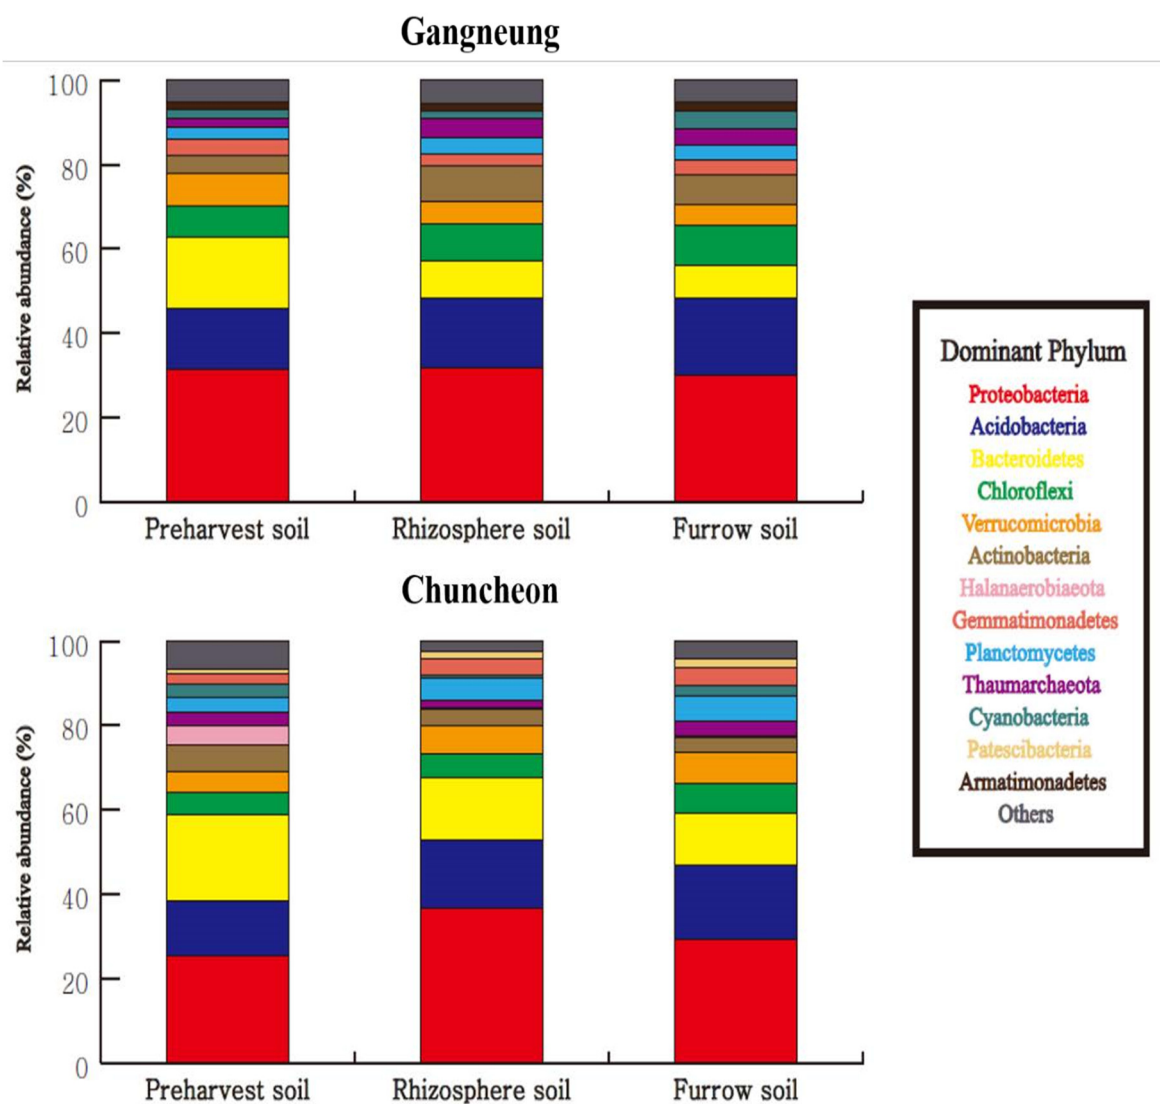

**Figure S2.** Dominant bacterial phylum according to sites, spatial locations and harvest time.

*Note:* Others -> unidentified bacterial groups. Preharvest; time of potato harvesting. Rhizosphere and furrow; spatial locations

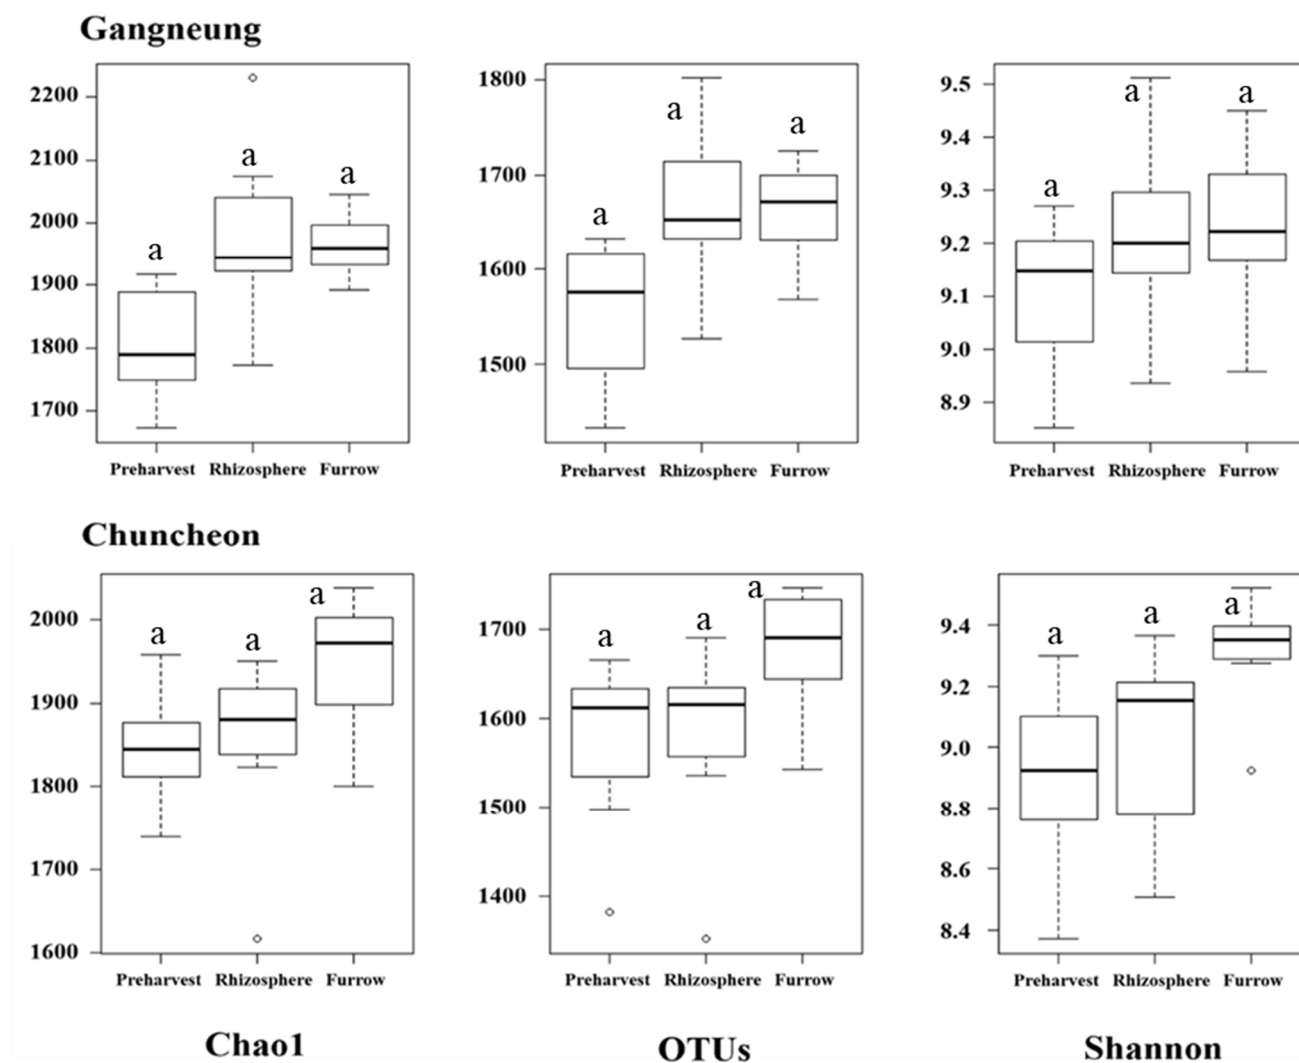

**Figure S3.** Bacterial diversity indices in Gangneung and Chuncheon.

*Note:* Postharvest - > time of potato harvesting

Rhizosphere and furrow - > spatial locations

Chao1 -> bacterial community richness

OTUs -> operational taxonomic units

Shannon -> bacterial diversity index

*Note:* Each box plots is represented with 3 average values. The values with same alphabetic letters are not significantly different at  $P < 0.05$ .

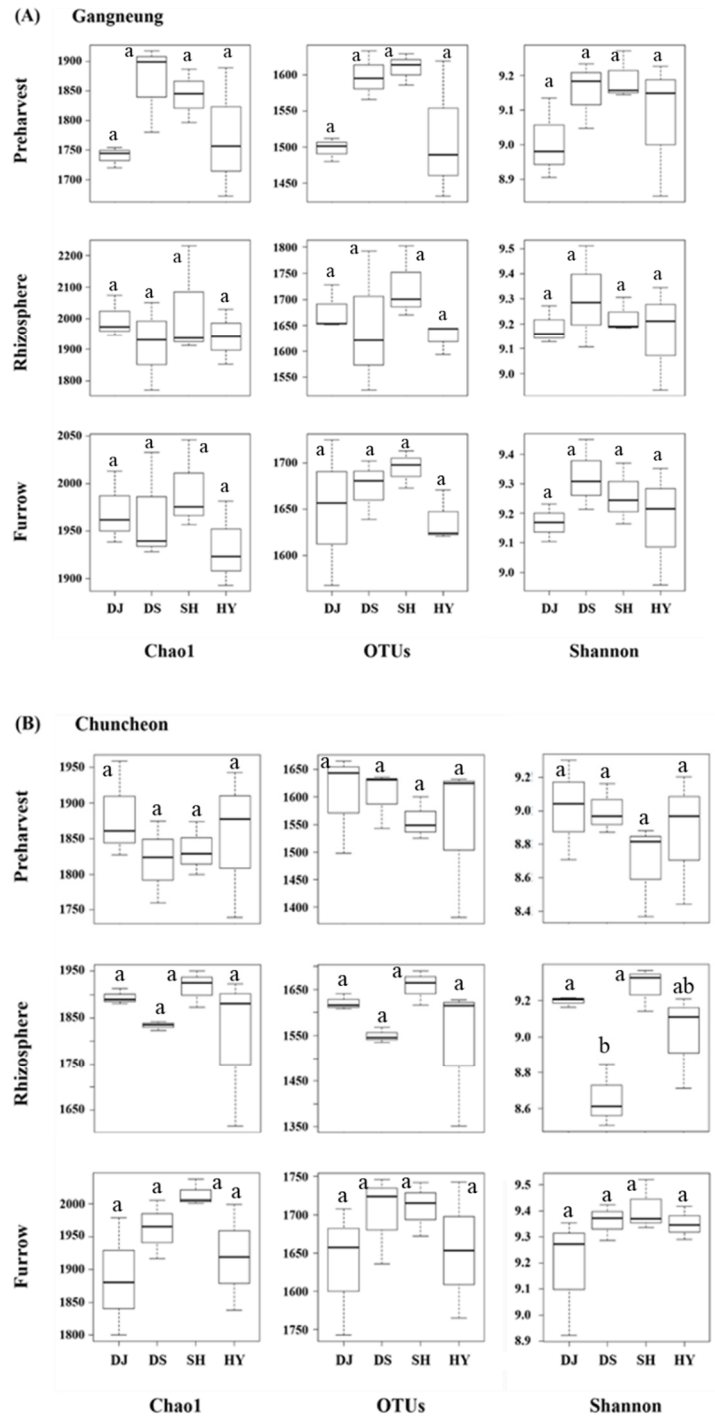

**Figure S4.** Bacterial diversity indices obtained after metagenomics sequencing from different varieties of potato cultivated soils in two different sites (Gangneung and Chuncheon) and spatial locations (rhizosphere and furrow). (A) Gangneung (B) Chuncheon. Each box plots is represented with 3 average values. The values with same alphabetic letters are not significantly different at  $P < 0.05$ .

*Note:* Preharvest; before harvesting of potato. Rhizosphere and furrow; spatial locations. Chao1; bacterial community richness. OTUs; operational taxonomic units. Shannon; bacterial diversity index

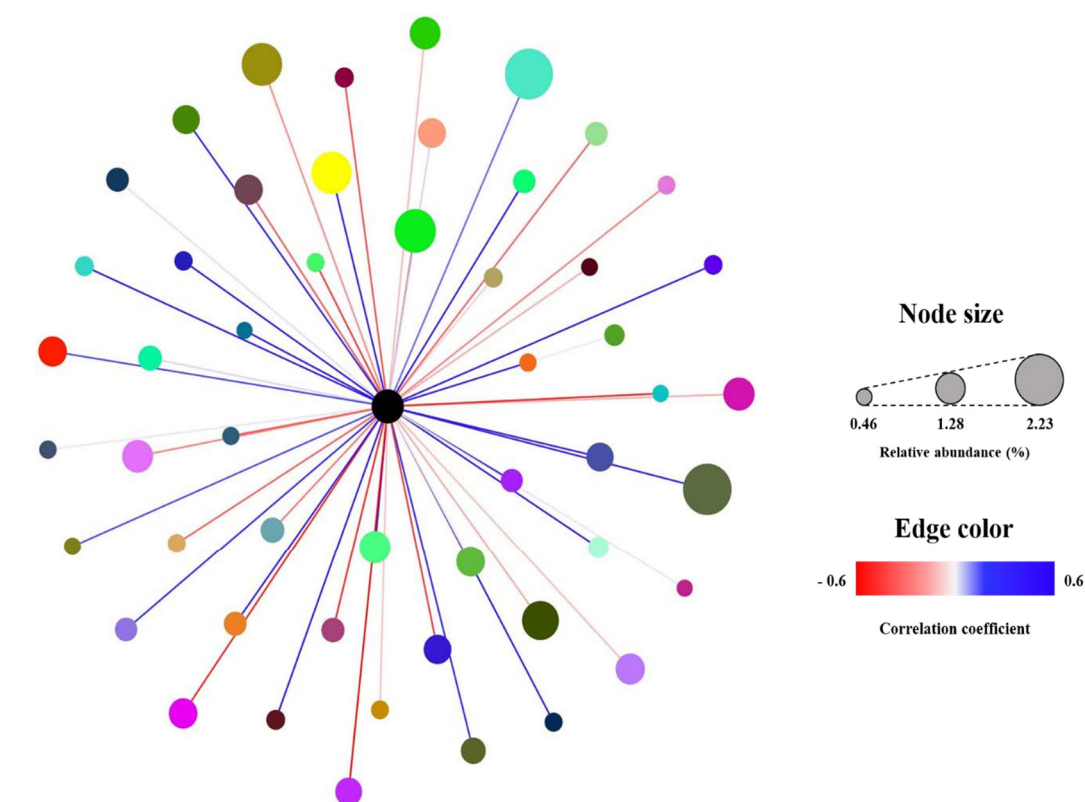

| Phylum           | Class                   | Order                      | Family                             | Genus (Mark)                       |
|------------------|-------------------------|----------------------------|------------------------------------|------------------------------------|
| Thaumarchaeota   | Nitrososphaeria         | Nitrososphaerales          | Nitrososphaeraceae                 | uncultured bacterium               |
| Acidobacteria    | Acidobacteria           | Acidobacteriales           | uncultured                         | Other                              |
|                  |                         | Soilbacteriales            | Soilbacteriaceae Subgroup 3        | Bryobacter                         |
|                  | Blautiaellia Subgroup 4 | Blautiaelliales            | Blautiaellaceae                    | Blautiaellia                       |
|                  |                         |                            | JGI 1001 1001                      | OLB17                              |
|                  |                         | metagenome                 | metagenome                         | metagenome                         |
|                  |                         |                            | uncultured Acidobacteria bacterium | uncultured Acidobacteria bacterium |
|                  | Subgroup 6              | uncultured proteobacterium | uncultured proteobacterium         | uncultured proteobacterium         |
|                  |                         |                            | Other                              | Other                              |
|                  |                         | Other                      | Other                              | Other                              |
|                  |                         | Other                      | Other                              | Other                              |
| Actinobacteria   | Actinobacteria          | Micrococcales              | Micrococcaceae                     | Pseudarthrobacter                  |
| Bacteroidetes    | Bacteroidia             | Chitinophagales            | Chitinophagaceae                   | Flavobacter                        |
|                  |                         |                            | Chitinophagaceae                   | Terrimonas                         |
|                  |                         | Cytophagales               | Micrococcaceae                     | uncultured                         |
|                  |                         |                            | Flavobacteriaceae                  | Flavobacterium                     |
|                  |                         | Sphingobacteriales         | ens OPS 17                         | uncultured bacterium               |
| Chloroflexi      | Chloroflexia            | Anaerolineae               | SR1101                             | AB                                 |
|                  |                         | Chloroflexiales            | Roseiflexaceae                     | uncultured                         |
|                  |                         | KD4 96                     | metagenome                         | metagenome                         |
| Gemmatimonadetes | Gemmatimonadetes        | Gemmatimonadales           | Gemmatimonadaceae                  | Gemmatimonas                       |
| Nitrospirae      | Nitrospira              | Nitrospirales              | Nitrospiraceae                     | uncultured                         |
| Patescibacteria  | Saccharinimadia         | Saccharinimadales          | uncultured bacterium               | uncultured bacterium               |
| Planctomycetes   | Planctomycetes          | Planctomycetales           | WD2101 soil group                  | uncultured bacterium               |
|                  | Planctomycetes          | Planctomycetales           | Other                              | Other                              |

|                |                     |                                    |                     |                                     |
|----------------|---------------------|------------------------------------|---------------------|-------------------------------------|
| Proteobacteria | Alphaproteobacteria | Micropepsales                      | Micropepsaceae      | uncultured                          |
|                |                     | Rhizobiales                        | Xanthobacteraceae   | Pseudolabrys                        |
|                |                     | Sphingomonadales                   | Sphingomonadaceae   | uncultured                          |
|                | Deltaproteobacteria | Myxococcales                       | Haliangiaceae       | Sphingomonas                        |
|                |                     |                                    |                     | Haliangium                          |
|                | Gammaproteobacteria | Betaproteobacteriales              | A21b                | uncultured Rhodocyclaceae bacterium |
|                |                     |                                    | Burkholderiaceae    | Massilia                            |
|                |                     |                                    |                     | Other                               |
|                |                     |                                    | Nitrosomonadaceae   | Ellin6067                           |
|                |                     | Cellvibrionales                    | Cellvibrionaceae    | MSD1                                |
|                |                     |                                    |                     | uncultured beta proteobacterium     |
|                |                     |                                    | Cellvibrionaceae    | Cellvibrio                          |
|                | Verrucomicrobia     | Gammaproteobacteria Incertae Sedis | Unknown             | Acidibacter                         |
|                |                     | Pseudomonadales                    | Pseudomonadaceae    | Pseudomonas                         |
|                |                     | Steroidobacteriales                | Steroidobacteraceae | Steroidobacter                      |
|                |                     | Xanthomonadales                    | Rhodanobacteraceae  | Rhodanobacter                       |
|                |                     | Xanthomonadales                    | Xanthomonadaceae    | Luteimonas                          |
|                |                     | Chthoniobacteriales                | Chthoniobacteraceae | Chthoniobacter                      |
| Other          | Other               | Other                              | Other               | Lacunisphaera                       |
|                |                     |                                    |                     | Opitutia                            |
|                |                     |                                    |                     | Other                               |

**Figure S5.** Correlation network analysis between *Streptomyces* spp. and other bacterial communities. The network was undirected and binary network as only microbial communities (color node) related with *Streptomyces* spp. (black node). The network analysis was performed on the basis of Spearman correlation analysis of microbial communities at the Genus level at a relative ratio (cut off  $> 0.1\%$ ).

*Note:* Colored column in the tables represents the different bacterial genus names used in the correlation network analysis with *Streptomyces* spp.
